# Supplementary material
Source: PubMed Central journal article supplement (PMC4644463)
Supplement: NIHMS719156-supplement.pdf [file NIHMS719156-supplement.pdf]

CD11b

MHC-II

CD11c

CD86

untreated

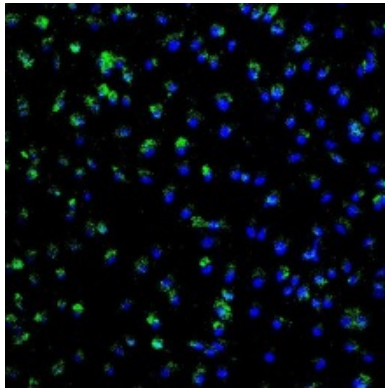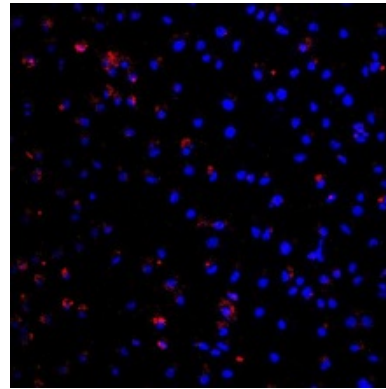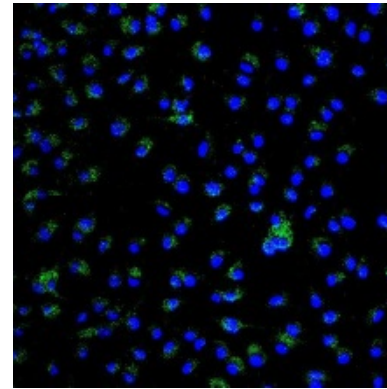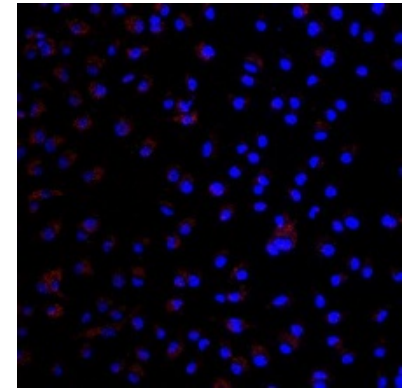

MOG+Len+NC

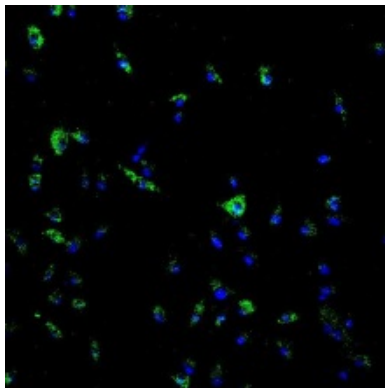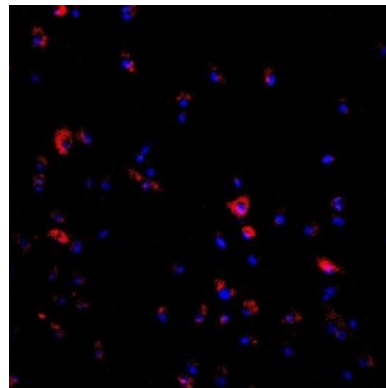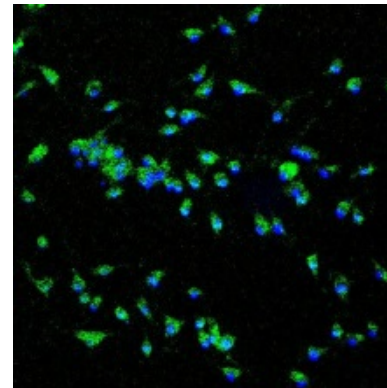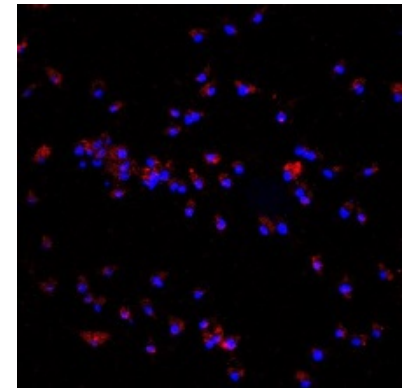

MOG

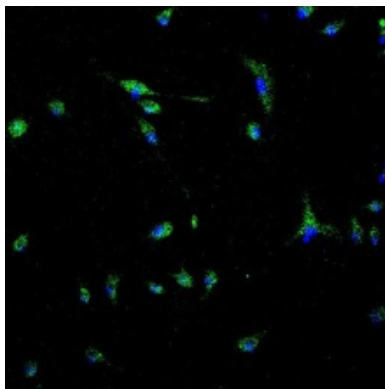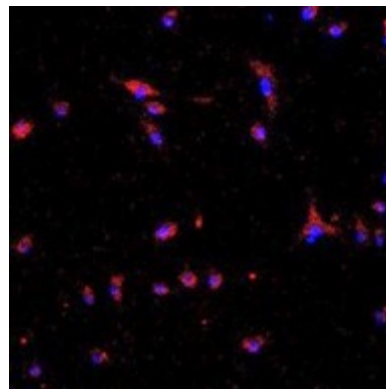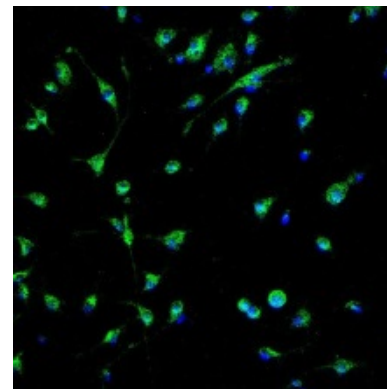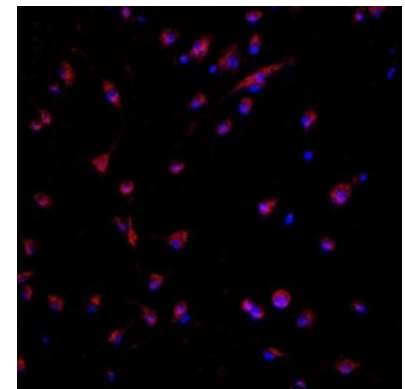

Splenocytes were culture for 72 hours in the presence of MOG, IL23 and combined treatment with Len + NC treatment or vehicle, and the cells were stained with antibodies against CD11b, C86, MHC-II and C11c. Representative images of the different treatments are presented.
